# Supplementary material for: Energetic and Geometric Characteristics of the Substituents: Part 2: The Case of NO2, Cl, and NH2 Groups in Their Mono-Substituted Derivatives of Simple Nitrogen Heterocycles
Source: MDPI journal article supplement (doi:10.3390/molecules26216543), 2021-10-29
Supplement: s1 [file s1]

## Supplementary Materials (SM)

# Energetic and Geometric Characteristics of the Substituents: Part 2: The Case of NO<sub>2</sub>, Cl, and NH<sub>2</sub> Groups in Their Mono-Substituted Derivatives of Simple Nitrogen Heterocycles

Paweł A. Wieczorkiewicz<sup>1,\*</sup>, Halina Szatyłowicz<sup>1</sup>, Tadeusz M. Krygowski<sup>2,\*</sup>

<sup>1</sup> Faculty of Chemistry, Warsaw University of Technology, Noakowskiego 3, 00-664 Warsaw, Poland

<sup>2</sup> Department of Chemistry, University of Warsaw, Pasteura 1, 02-093 Warsaw, Poland

\* Correspondence: [tmkryg@chem.uw.edu.pl](mailto:tmkryg@chem.uw.edu.pl) (T.M.K.); [pwieczorkiewicz@outlook.com](mailto:pwieczorkiewicz@outlook.com) (P.A.W.)

### Table of Contents

|                                                                                                                                                                                                                                                                                                                                                                                                                                         |       |
|-----------------------------------------------------------------------------------------------------------------------------------------------------------------------------------------------------------------------------------------------------------------------------------------------------------------------------------------------------------------------------------------------------------------------------------------|-------|
| <b>Figure S1.</b> Relations between electron density at NO(H) bond critical point (BCP) and its length, electron density at CN BCP and its length, electron density at NO(N) BCP and its length, electron density at CN BCP and cSAR(X) of substituent for the nitro derivatives of studied heterocycles; for the amino derivatives relation between electron density at CN BCP and its length, and the cSAR(X).                        | SM 2  |
| <b>Figure S2.</b> Relationships between electronic characteristics of the substituents, cSAR(X) and $\alpha$ angle for X = NH <sub>2</sub> , NO <sub>2</sub> , and Cl.                                                                                                                                                                                                                                                                  | SM 3  |
| <b>Figure S3.</b> RDG isosurfaces (at RDG = 0.50)                                                                                                                                                                                                                                                                                                                                                                                       | SM 3  |
| <b>Figure S4.</b> Electrostatic potential mapped onto the $\rho = 0.01$ a.u. isosurface for 2-NO <sub>2</sub> -pyridine, 2-NH <sub>2</sub> -pyridine and 2-Cl-pyridine.                                                                                                                                                                                                                                                                 | SM 6  |
| <b>Table S1.</b> Electron densities at CX, NY(H) and NY(N) bond critical points, and Y...N(H), Y...H(N) distances (Y = O in NO <sub>2</sub> , H in NH <sub>2</sub> ).                                                                                                                                                                                                                                                                   | SM 8  |
| <b>Table S2.</b> Data regarding the $E_{\text{rel}}$ , $d_{\text{CX}}$ , $\alpha$ , $\angle \text{YNY}$ , $\Delta\alpha$ , cSAR(X), $d_{\text{NY(H)}}$ , $d_{\text{NY(N)}}$ , $\Delta\text{pEDA(X)}$ , $\Delta\text{sEDA(X)}$ , $\angle \text{CNO(N)}$ , $\angle \text{CNO(H)}$ and rotation of the nitro group in all studied heterocycles as well as in benzene and naphthalene NO <sub>2</sub> , NH <sub>2</sub> and Cl derivatives. | SM 10 |

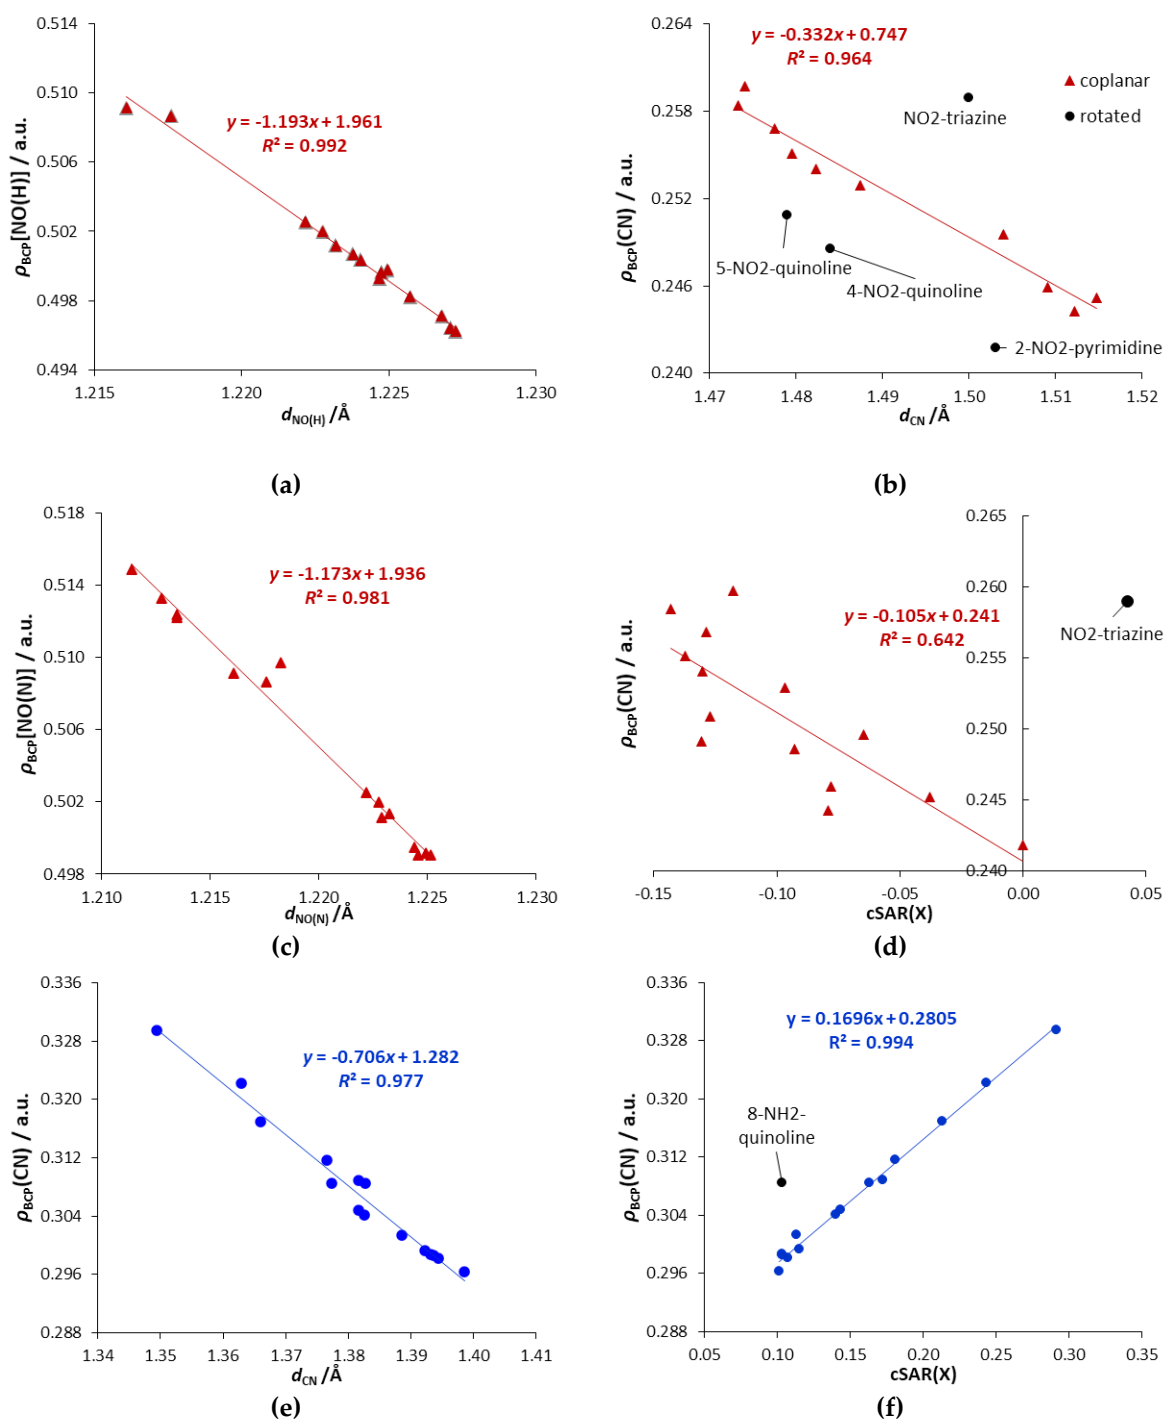

**Figure S1.** Relations between electron density at NO(H) bond critical point (BCP) and its length (a), electron density at CN BCP and its length (b), electron density at NO(N) BCP and its length (c), electron density at CN BCP and cSAR(X) of substituent (d) for the nitro derivatives of studied heterocycles; for the amino derivatives relation between electron density at CN BCP and its length (e), and the cSAR(X) (f).

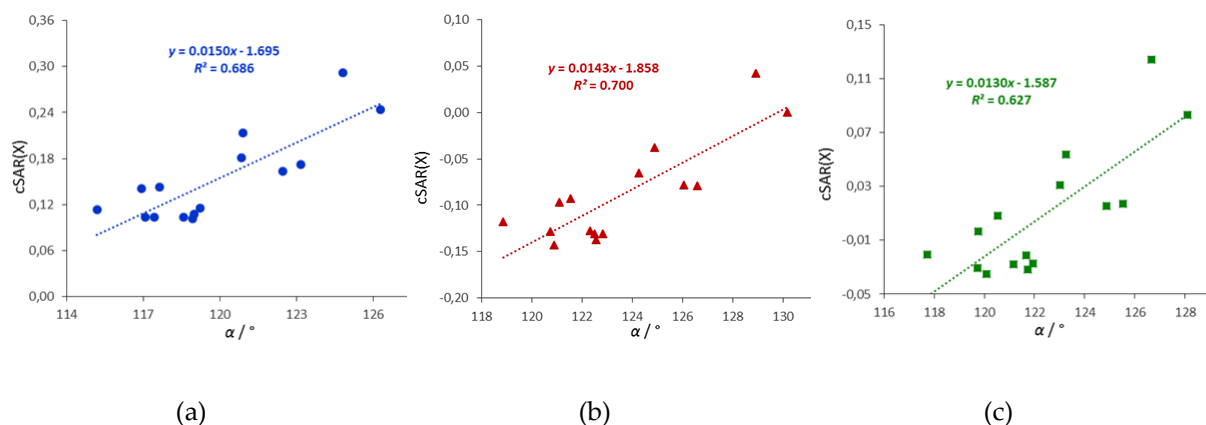

**Figure S2.** Relationships between electronic characteristics of the substituents, cSAR(X) and  $\alpha$  angle for X = NH<sub>2</sub> (a), NO<sub>2</sub> (b), and Cl (c); for nitro derivatives only planar systems are considered.

**Figure S3.** RDG isosurfaces (at RDG = 0.50). Isosurfaces are colored according to the value of  $\text{sign}[\lambda_2(r)] \cdot \rho(r)$ ; highly negative values in blue (indicating strong H-bonding interaction), around zero in green (van der Waals interaction), highly positive in red (steric repulsion).

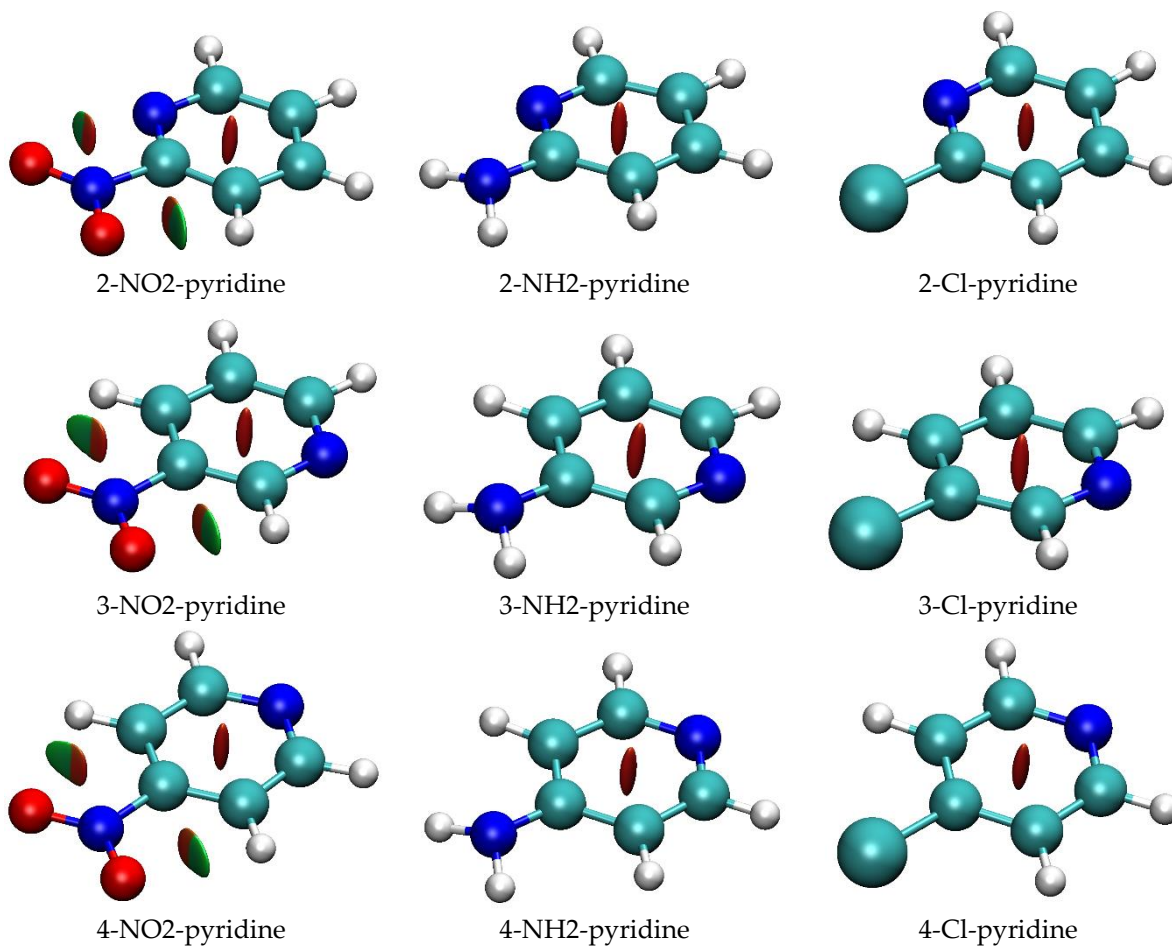

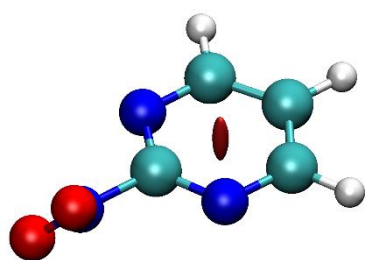

2-NO<sub>2</sub>-pyrimidine

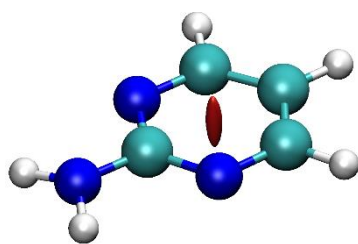

2-NH<sub>2</sub>-pyrimidine

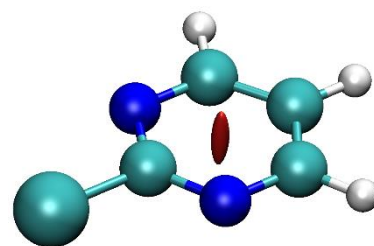

2-Cl-pyrimidine

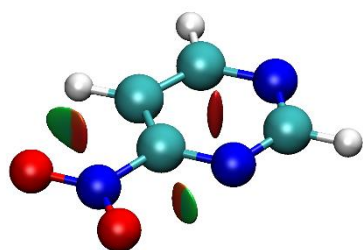

4-NO<sub>2</sub>-pyrimidine

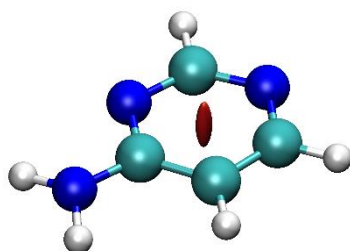

4-NH<sub>2</sub>-pyrimidine

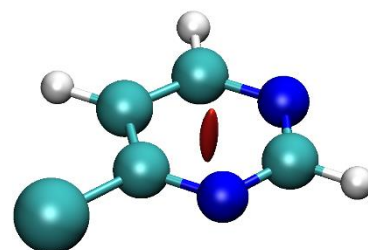

4-Cl-pyrimidine

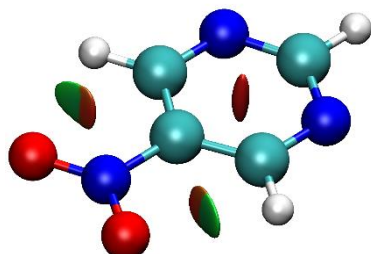

5-NO<sub>2</sub>-pyrimidine

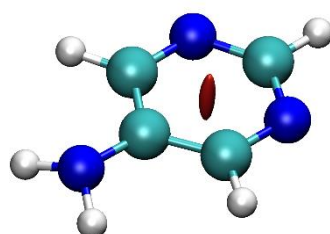

5-NH<sub>2</sub>-pyrimidine

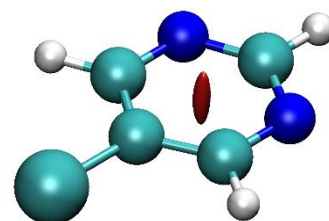

5-Cl-pyrimidine

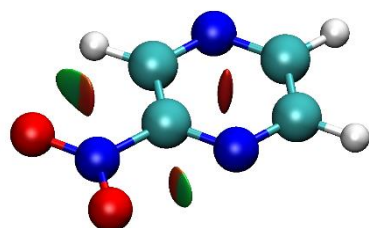

NO<sub>2</sub>-pyrazine

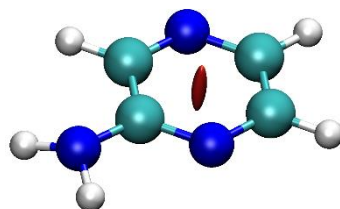

NH<sub>2</sub>-pyrazine

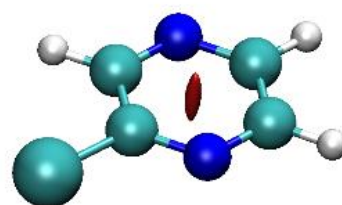

Cl-pyrazine

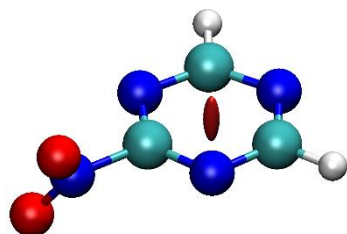

NO<sub>2</sub>-triazine

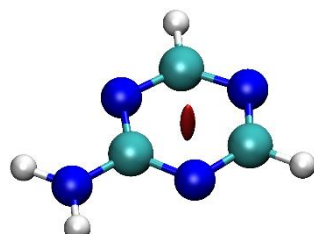

NH<sub>2</sub>-triazine

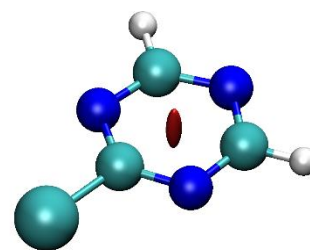

Cl-triazine

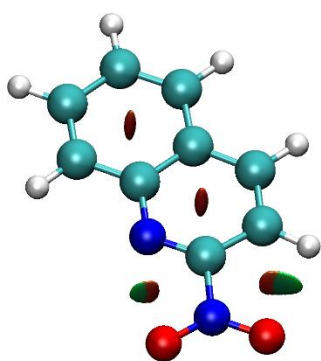

2-NO<sub>2</sub>-quinoline

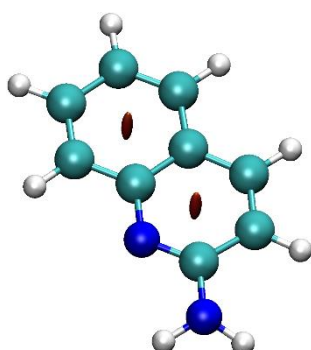

2-NH<sub>2</sub>-quinoline

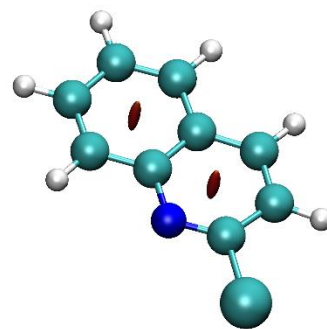

2-Cl-quinoline

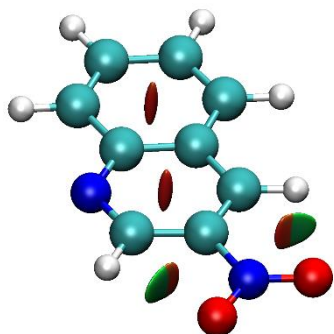

3-NO<sub>2</sub>-quinoline

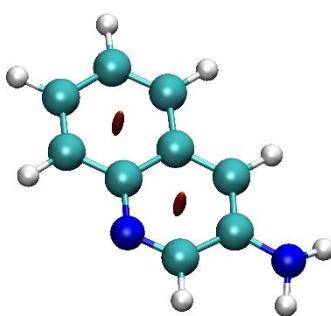

3-NH<sub>2</sub>-quinoline

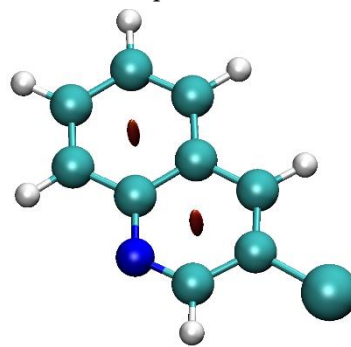

3-Cl-quinoline

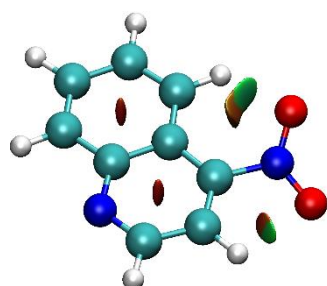

4-NO<sub>2</sub>-quinoline

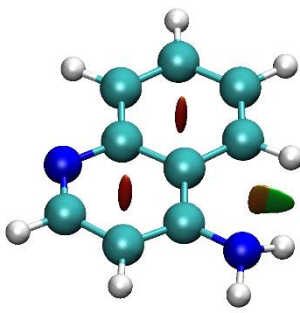

4-NH<sub>2</sub>-quinoline

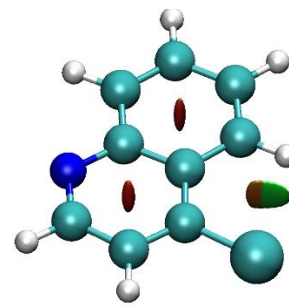

4-Cl-quinoline

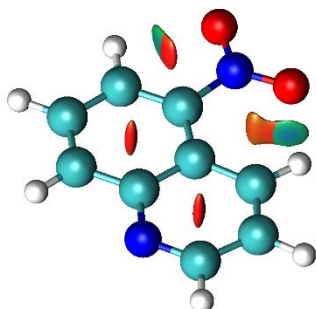

5-NO<sub>2</sub>-quinoline

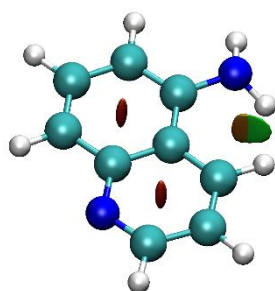

5-NH<sub>2</sub>-quinoline

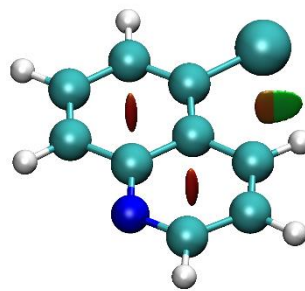

5-Cl-quinoline

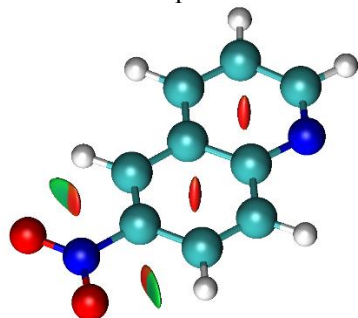

6-NO<sub>2</sub>-quinoline

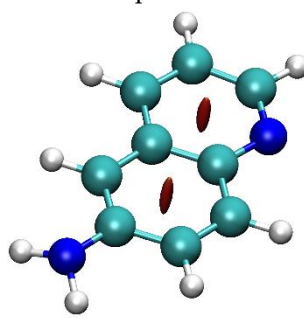

6-NH<sub>2</sub>-quinoline

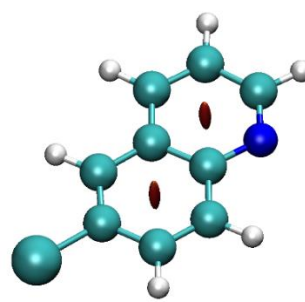

6-Cl-quinoline



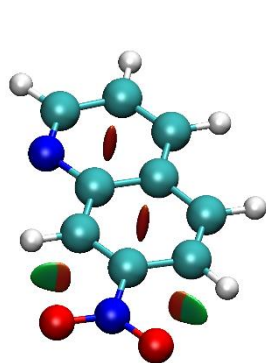

7-NO<sub>2</sub>-quinoline

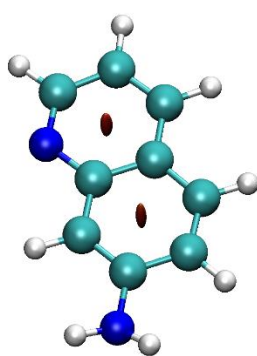

7-NH<sub>2</sub>-quinoline

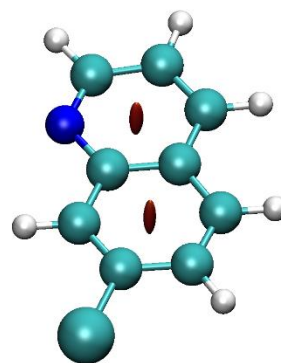

7-Cl-quinoline

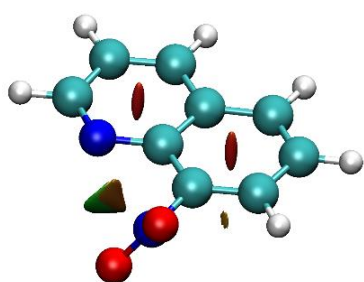

8-NO<sub>2</sub>-quinoline

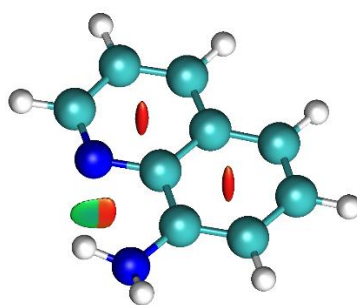

8-NH<sub>2</sub>-quinoline

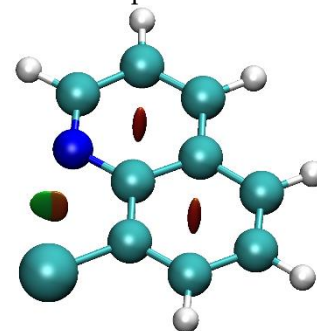

8-Cl-quinoline

ESP (kcal/mol)

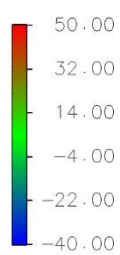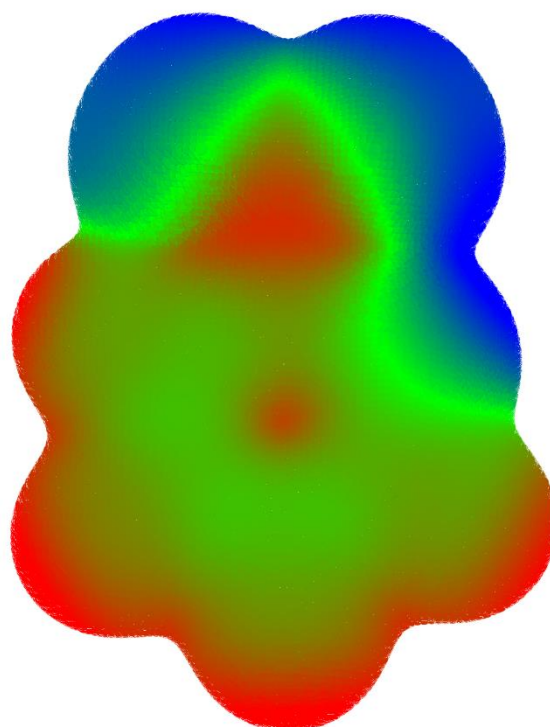

(a)

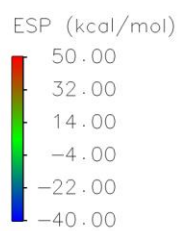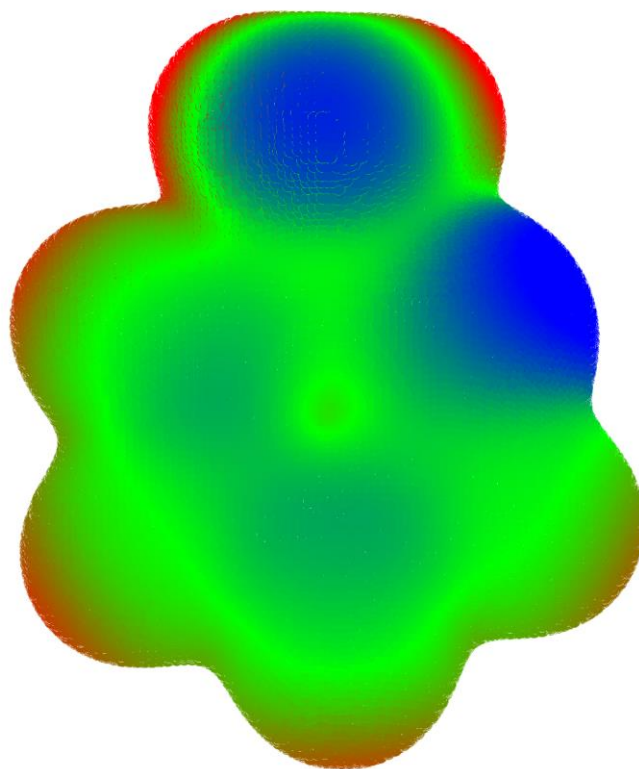

(b)

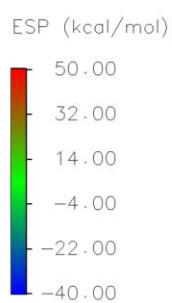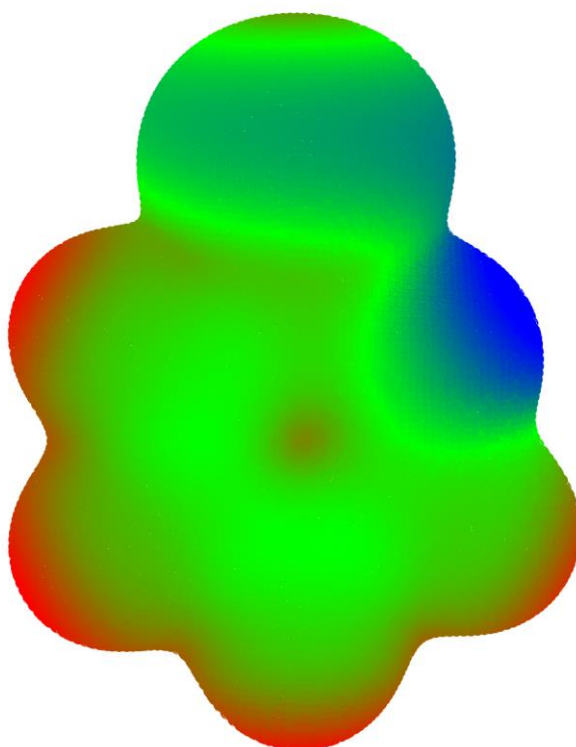

(c)

**Figure S4.** Electrostatic potential mapped onto the  $\rho = 0.01$  a.u. isosurface for 2-NO<sub>2</sub>-pyridine (a), 2-NH<sub>2</sub>-pyridine (b) and 2-Cl-pyridine (c).

**Table S1.** Electron densities at CX, NY(H) and NY(N) bond critical points, and Y...N(H), Y...H(N) distances (Y = O in NO<sub>2</sub>, H in NH<sub>2</sub>).  $d_{Y\cdots N(H)}$  denotes the distance between Y (Y = O in NO<sub>2</sub> and H in NH<sub>2</sub>) and *ortho* N atom. In asymmetric non-*ortho* derivatives it indicated distance to the H atom of the *ortho* C-H group closer to the *endo* N.  $d_{Y\cdots H(N)}$  denotes the distance to the *ortho* C-H group further to the *endo* N, or, in the case of double *ortho* derivatives, second *endo* N atom.

|                               | $\rho_{\text{BCP}}(\text{CX}) /$<br>a.u. | $\rho_{\text{BCP}}[\text{NY}(\text{N})] /$<br>a.u. | $\rho_{\text{BCP}}[\text{NY}(\text{H})] /$<br>a.u. | $d_{Y\cdots N(H)} / \text{\AA}$ | $d_{Y\cdots H(N)} / \text{\AA}$ |
|-------------------------------|------------------------------------------|----------------------------------------------------|----------------------------------------------------|---------------------------------|---------------------------------|
| 2-NO <sub>2</sub> -pyridine   | 0.2459                                   | 0.5123                                             | 0.4964                                             | 2.653                           | 2.396                           |
| 3-NO <sub>2</sub> -pyridine   | 0.2568                                   | 0.5004                                             | 0.5013                                             | 2.435                           | 2.425                           |
| 4-NO <sub>2</sub> -pyridine   | 0.2529                                   | 0.5025                                             | 0.5025                                             | 2.442                           | 2.442                           |
| 2-NO <sub>2</sub> -pyrimidine | 0.2418                                   | 0.5087                                             | 0.5087                                             | 2.821                           | 2.821                           |
| 4-NO <sub>2</sub> -pyrimidine | 0.2452                                   | 0.5149                                             | 0.4993                                             | 2.662                           | 2.439                           |
| 5-NO <sub>2</sub> -pyrimidine | 0.2597                                   | 0.5020                                             | 0.5020                                             | 2.467                           | 2.467                           |
| NO <sub>2</sub> -pyrazine     | 0.2496                                   | 0.5132                                             | 0.4982                                             | 2.662                           | 2.437                           |
| NO <sub>2</sub> -triazine     | 0.2589                                   | 0.5091                                             | 0.5091                                             | 2.887                           | 2.887                           |
| 2-NO <sub>2</sub> -quinoline  | 0.2442                                   | 0.5122                                             | 0.4962                                             | 2.649                           | 2.390                           |
| 3-NO <sub>2</sub> -quinoline  | 0.2584                                   | 0.4991                                             | 0.4996                                             | 2.425                           | 2.419                           |
| 4-NO <sub>2</sub> -quinoline  | 0.2485                                   | 0.5012                                             | 0.5007                                             | 2.478                           | 2.268                           |
| 5-NO <sub>2</sub> -quinoline  | 0.2508                                   | 0.4995                                             | 0.4971                                             | 2.210                           | 2.390                           |
| 6-NO <sub>2</sub> -quinoline  | 0.2551                                   | 0.4991                                             | 0.4998                                             | 2.398                           | 2.391                           |
| 7-NO <sub>2</sub> -quinoline  | 0.2540                                   | 0.4990                                             | 0.5012                                             | 2.422                           | 2.389                           |
| 8-NO <sub>2</sub> -quinoline  | 0.2491                                   | 0.5097                                             | 0.4925                                             | 2.940                           | 2.726                           |
| 2-NH <sub>2</sub> -pyridine   | 0.3085                                   | 0.3389                                             | 0.3404                                             | 2.430                           | 2.499                           |
| 3-NH <sub>2</sub> -pyridine   | 0.2986                                   | 0.3395                                             | 0.3395                                             | 2.428                           | 2.487                           |
| 4-NH <sub>2</sub> -pyridine   | 0.3042                                   | 0.3402                                             | 0.3402                                             | 2.474                           | 2.474                           |
| 2-NH <sub>2</sub> -pyrimidine | 0.3223                                   | 0.3405                                             | 0.3405                                             | 2.475                           | 2.475                           |
| 4-NH <sub>2</sub> -pyrimidine | 0.3169                                   | 0.3389                                             | 0.3409                                             | 2.452                           | 2.541                           |
| 5-NH <sub>2</sub> -pyrimidine | 0.3014                                   | 0.3392                                             | 0.3392                                             | 2.494                           | 2.494                           |
| NH <sub>2</sub> -pyrazine     | 0.3116                                   | 0.3384                                             | 0.3402                                             | 2.460                           | 2.510                           |
| NH <sub>2</sub> -triazine     | 0.3295                                   | 0.3401                                             | 0.3401                                             | 2.491                           | 2.491                           |
| 2-NH <sub>2</sub> -quinoline  | 0.3088                                   | 0.3388                                             | 0.3403                                             | 2.441                           | 2.461                           |
| 3-NH <sub>2</sub> -quinoline  | 0.2987                                   | 0.3393                                             | 0.3395                                             | 2.399                           | 2.499                           |
| 4-NH <sub>2</sub> -quinoline  | 0.3048                                   | 0.3403                                             | 0.3410                                             | 2.416                           | 2.056                           |
| 5-NH <sub>2</sub> -quinoline  | 0.2963                                   | 0.3399                                             | 0.3396                                             | 2.120                           | 2.356                           |
| 6-NH <sub>2</sub> -quinoline  | 0.2981                                   | 0.3400                                             | 0.3398                                             | 2.403                           | 2.445                           |
| 7-NH <sub>2</sub> -quinoline  | 0.2993                                   | 0.3400                                             | 0.3399                                             | 2.457                           | 2.410                           |
| 8-NH <sub>2</sub> -quinoline  | 0.3085                                   | 0.3380                                             | 0.3404                                             | 2.286                           | 2.511                           |



|               |        |
|---------------|--------|
| pyridine2Cl   | 0.1923 |
| pyridine3Cl   | 0.1938 |
| pyridine4Cl   | 0.1952 |
| pyrimidine2Cl | 0.2003 |
| pyrimidine4Cl | 0.1973 |
| pyrimidine5Cl | 0.1968 |
| pyrazineCl    | 0.1960 |
| triazineCl    | 0.2047 |
| quinoline2Cl  | 0.1909 |
| quinoline3Cl  | 0.1934 |
| quinoline4Cl  | 0.1934 |
| quinoline5Cl  | 0.1901 |
| quinoline6Cl  | 0.1920 |
| quinoline7Cl  | 0.1924 |
| quinoline8Cl  | 0.1964 |

**Table S2.** Data regarding the  $E_{\text{rel}}$  (kcal/mol),  $d_{\text{CX}}$  (Å),  $\alpha$  (°),  $\angle\text{YNY}$  (°),  $\Delta\alpha$  (°),  $\text{cSAR(X)}$ ,  $d_{\text{NY(H)}}$  (Å),  $d_{\text{NY(N)}}$  (Å),  $\Delta\text{pEDA(X)}$ ,  $\Delta\text{sEDA(X)}$ ,  $\angle\text{CNO(N)}$  (°),  $\angle\text{CNO(H)}$  (°), and rotation of the nitro group (°) in all studied heterocycles as well as in benzene and naphthalene  $\text{NO}_2$ ,  $\text{NH}_2$  and  $\text{Cl}$  derivatives. Naming of geometry parameters is explained in Figure 4 in the manuscript.

| <b>RX</b>                         | $E_{\text{rel}}$ | $d_{\text{CX}}$ | $\alpha$ | $\angle\text{YNY}$ | $\Delta\alpha$ | $\text{cSAR(X)}$ | $d_{\text{NY(H)}}$ | $d_{\text{NY(N)}}$ | $\Delta\text{pEDA(X)}$ | $\Delta\text{sEDA(X)}$ | $\angle\text{CNY(N)}$ | $\angle\text{CNY(H)}$ | $\text{NO}_2$ rotation |
|-----------------------------------|------------------|-----------------|----------|--------------------|----------------|------------------|--------------------|--------------------|------------------------|------------------------|-----------------------|-----------------------|------------------------|
| <b>benzNO<sub>2</sub></b>         | 0                | 1.4812          | 122.3    | 124.7              | 2.32           | -0.138           | 1.225              | 1.225              | 0                      | 0                      | 117.7                 | 117.7                 | 0                      |
| <b>pyridine2NO<sub>2</sub></b>    | 2.27             | 1.5092          | 126.1    | 125.7              | 2.46           | -0.078           | 1.227              | 1.213              | -0.032                 | 0.002                  | 118.2                 | 116.1                 | 0                      |
| <b>pyridine3NO<sub>2</sub></b>    | 2.63             | 1.4776          | 120.7    | 125.1              | 2.27           | -0.128           | 1.224              | 1.223              | -0.010                 | -0.024                 | 117.5                 | 117.4                 | 0                      |
| <b>pyridine4NO<sub>2</sub></b>    | 3.01             | 1.4875          | 121.1    | 125.3              | 2.53           | -0.097           | 1.222              | 1.222              | -0.024                 | -0.019                 | 117.4                 | 117.4                 | 0                      |
| <b>pyrimidine2NO<sub>2</sub></b>  | 6.29             | 1.5031          | 130.1    | 127.0              | 3.13           | 0.000            | 1.218              | 1.218              | -0.166                 | 0.096                  | 116.5                 | 116.5                 | 56                     |
| <b>pyrimidine4NO<sub>2</sub></b>  | 4.97             | 1.5148          | 124.9    | 126.3              | 2.66           | -0.038           | 1.225              | 1.211              | -0.042                 | -0.016                 | 117.9                 | 115.8                 | 0                      |
| <b>pyrimidine5NO<sub>2</sub></b>  | 5.30             | 1.4742          | 118.9    | 125.5              | 2.30           | -0.118           | 1.223              | 1.223              | -0.013                 | -0.019                 | 117.2                 | 117.2                 | 0                      |
| <b>pyrazineNO<sub>2</sub></b>     | 5.01             | 1.5041          | 124.3    | 126.1              | 2.27           | -0.065           | 1.226              | 1.213              | -0.035                 | -0.004                 | 118.1                 | 115.8                 | 0                      |
| <b>triazineNO<sub>2</sub></b>     | 8.55             | 1.5001          | 128.9    | 127.6              | 3.22           | 0.043            | 1.216              | 1.216              | -0.207                 | 0.114                  | 115.5                 | 116.2                 | 66                     |
| <b>naphthalene1NO<sub>2</sub></b> | 4.54             | 1.4870          | 122.1    | 123.3              | 1.20           | -0.131           | 1.226*             | 1.226              | -                      | -                      | 117.7                 | 119.0                 | 0                      |
| <b>naphthalene2NO<sub>2</sub></b> | -0.38            | 1.4781          | 122.5    | 124.6              | 2.22           | -0.148           | 1.226*             | 1.225              | 0.009                  | 0.000                  | 117.5*                | 118.0                 | 0                      |
| <b>quinoline2NO<sub>2</sub></b>   | 1.75             | 1.5123          | 126.6    | 125.6              | 2.40           | -0.079           | 1.227              | 1.213              | -0.034                 | -0.016                 | 118.3                 | 116.1                 | 0                      |
| <b>quinoline3NO<sub>2</sub></b>   | 1.95             | 1.4733          | 120.9    | 124.9              | 2.20           | -0.143           | 1.225              | 1.225              | -0.014                 | -0.017                 | 117.4                 | 117.7                 | 0                      |
| <b>quinoline4NO<sub>2</sub></b>   | 6.10             | 1.4841          | 121.5    | 125.0              | 2.17           | -0.093           | 1.224              | 1.223              | -0.102                 | 0.063                  | 117.9                 | 117.1                 | 35                     |

|                            |        |        |        |       |       |        |        |       |        |        |        |       |    |
|----------------------------|--------|--------|--------|-------|-------|--------|--------|-------|--------|--------|--------|-------|----|
| quinoline5NO <sub>2</sub>  | 4.12   | 1.4791 | 122.3  | 124.3 | 1.87  | -0.127 | 1.227  | 1.224 | -0.057 | 0.046  | 118.2  | 117.5 | 28 |
| quinoline6NO <sub>2</sub>  | 0.59   | 1.4796 | 122.6  | 124.7 | 2.26  | -0.137 | 1.225  | 1.225 | -0.013 | -0.018 | 117.4  | 117.9 | 0  |
| quinoline7NO <sub>2</sub>  | 1.13   | 1.4824 | 122.8  | 124.8 | 2.20  | -0.130 | 1.223  | 1.225 | -0.017 | -0.019 | 117.9  | 117.3 | 0  |
| quinoline8NO <sub>2</sub>  | 7.34   | 1.4782 | 122.5  | 125.7 | 2.05  | -0.130 | 1.225  | 1.218 | -0.195 | 0.128  | 117.4  | 116.8 | 58 |
| benzNH <sub>2</sub>        | 0      | 1.3983 | 118.5  | 112.1 | -1.42 | 0.094  | 1.009  | 1.009 | 0      | 0      | 115.6  | 115.6 |    |
| pyridine2NH <sub>2</sub>   | -6.71  | 1.3827 | 122.5  | 122.5 | -1.14 | 0.163  | 1.007  | 1.009 | -0.053 | 0.065  | 114.7  | 117.9 |    |
| pyridine3NH <sub>2</sub>   | 0.04   | 1.3940 | 117.1  | 117.1 | -1.40 | 0.104  | 1.009  | 1.009 | -0.042 | 0.060  | 115.9  | 116.1 |    |
| pyridine4NH <sub>2</sub>   | -3.02  | 1.3826 | 116.9  | 116.9 | -1.63 | 0.140  | 1.008  | 1.008 | -0.049 | 0.060  | 117.4  | 117.4 |    |
| pyrimidine2NH <sub>2</sub> | -11.99 | 1.3629 | 126.3  | 119.4 | -0.75 | 0.244  | 1.006  | 1.006 | -0.068 | 0.057  | 118.1  | 118.1 |    |
| pyrimidine4NH <sub>2</sub> | -10.08 | 1.3660 | 120.9  | 117.6 | -1.32 | 0.213  | 1.006  | 1.008 | -0.064 | -0.041 | 116.8  | 120.0 |    |
| pyrimidine5NH <sub>2</sub> | -0.05  | 1.3880 | 115.2  | 112.8 | -1.37 | 0.114  | 1.009  | 1.009 | -0.042 | -0.023 | 116.5  | 116.5 |    |
| pyrazineNH <sub>2</sub>    | -6.99  | 1.3766 | 120.8  | 115.7 | -1.14 | 0.181  | 1.007  | 1.009 | -0.056 | 0.068  | 115.5  | 118.4 |    |
| triazineNH <sub>2</sub>    | -15.84 | 1.3494 | 124.8  | 120.9 | -0.90 | 0.292  | 1.006  | 1.006 | -0.075 | 0.058  | 119.5  | 119.5 |    |
| naphtalene1NH <sub>2</sub> | 0.96   | 1.3984 | 119.32 | 111.4 | -1.55 | 0.097  | 1.010* | 1.009 | -      | -      | 114.4* | 115.9 |    |
| naphtalene2NH <sub>2</sub> | -0.18  | 1.3972 | 118.99 | 112.2 | -1.30 | 0.097  | 1.009  | 1.009 | -0.005 | -0.002 | 115.7* | 115.7 |    |
| quinoline2NH <sub>2</sub>  | -7.61  | 1.3816 | 123.2  | 115.4 | -1.01 | 0.172  | 1.008  | 1.009 | -0.074 | -0.014 | 114.9  | 118.1 |    |

|                           |       |        |       |       |       |        |       |       |        |        |        |       |
|---------------------------|-------|--------|-------|-------|-------|--------|-------|-------|--------|--------|--------|-------|
| quinoline3NH <sub>2</sub> | 0.03  | 1.3930 | 117.4 | 112.5 | -1.25 | 0.104  | 1.009 | 1.009 | -0.045 | -0.011 | 116.0  | 116.2 |
| quinoline4NH <sub>2</sub> | -2.19 | 1.3817 | 117.6 | 113.5 | -1.73 | 0.143  | 1.007 | 1.008 | -0.063 | -0.013 | 116.4  | 117.9 |
| quinoline5NH <sub>2</sub> | 1.01  | 1.3985 | 118.9 | 111.3 | -1.52 | 0.101  | 1.010 | 1.010 | -0.054 | 0.077  | 114.4  | 116.0 |
| quinoline6NH <sub>2</sub> | -0.49 | 1.3944 | 119.0 | 112.6 | -1.32 | 0.108  | 1.009 | 1.009 | -0.054 | 0.074  | 116.0  | 116.1 |
| quinoline7NH <sub>2</sub> | -1.08 | 1.3922 | 119.2 | 112.9 | -1.40 | 0.115  | 1.009 | 1.009 | -0.048 | 0.063  | 116.2  | 116.4 |
| quinoline8NH <sub>2</sub> | -3.38 | 1.3774 | 118.6 | 116.3 | -1.87 | 0.104  | 1.007 | 1.010 | -0.053 | 0.057  | 114.9  | 118.0 |
| benzCl                    | 0     | 1.7604 |       |       | 1.42  | -0.051 |       |       | 0      | 0      |        |       |
| pyridine2Cl               | -1.50 | 1.7635 | 124.9 |       | 1.26  | 0.016  |       |       | -0.015 | -0.002 | 116.7  | 118.5 |
| pyridine3Cl               | 1.01  | 1.7540 | 119.7 |       | 1.28  | -0.030 |       |       | -0.002 | -0.017 | 119.8  | 120.5 |
| pyridine4Cl               | 0.23  | 1.7513 | 119.8 |       | 1.21  | -0.004 |       |       | -0.011 | -0.012 | 120.1  | 120.1 |
| pyrimidine2Cl             | -0.51 | 1.7499 | 128.1 |       | 1.09  | 0.083  |       |       | -0.031 | -0.016 | 116.0  | 116.0 |
| pyrimidine4Cl             | -1.35 | 1.7524 | 123.2 |       | 1.03  | 0.054  |       |       | -0.027 | -0.010 | 117.2  | 119.6 |
| pyrimidine5Cl             | 1.99  | 1.7460 | 117.7 |       | 1.18  | -0.020 |       |       | -0.005 | -0.029 | 121.1  | 121.1 |
| pyrazineCl                | -0.60 | 1.7545 | 123.0 |       | 1.05  | 0.031  |       |       | -0.016 | 0.005  |        |       |
| triazineCl                | -0.56 | 1.7407 | 126.7 |       | 0.97  | 0.124  |       |       | -0.039 | 0.000  |        |       |
| naphtalene1Cl             | 0.85  | 1.7623 | 122.1 |       | 1.23  | -0.038 |       |       | -      | -      | 118.2* | 119.7 |

|                      |       |        |       |       |        |        |        |        |       |
|----------------------|-------|--------|-------|-------|--------|--------|--------|--------|-------|
| <b>naphtalene2Cl</b> | 0.01  | 1.7599 | 121.8 | 0.89  | -0.052 | -      | -      | 118.4* | 119.8 |
| <b>quinoline2Cl</b>  | -2.25 | 1.7666 | 125.5 | 1.34  | 0.017  | -0.019 | -0.009 | 117.2  | 117.3 |
| <b>quinoline3Cl</b>  | 0.92  | 1.7540 | 120.1 | 1.38  | -0.035 | -0.003 | -0.004 | 118.8  | 121.1 |
| <b>quinoline4Cl</b>  | 0.67  | 1.7547 | 120.5 | 1.166 | 0.008  | -0.010 | -0.008 |        |       |
| <b>quinoline5Cl</b>  | 0.94  | 1.7616 | 121.7 | 1.224 | -0.021 | -0.003 | -0.002 |        |       |
| <b>quinoline6Cl</b>  | 0.39  | 1.7580 | 121.7 | 1.410 | -0.032 | -0.003 | -0.008 |        |       |
| <b>quinoline7Cl</b>  | 0.35  | 1.7575 | 122.0 | 1.328 | -0.027 | -0.005 | -0.011 |        |       |
| <b>quinoline8Cl</b>  | 2.60  | 1.7478 | 121.2 | 0.730 | -0.028 | -0.010 | -0.020 | 119.5  | 119.3 |

\*bond or angle in naphthalene derivative towards the substituted six-membered ring or in the direction where the second six-membered ring is further from the substituted ring.
